# Supplementary material
Source: HighWire-hosted journal article supplement (https://www.annfammed.org/highwire/filestream/8204/field_highwire_adjunct_files/0/Morris_Suppl_App1.pdf)
Supplement: Morris_Suppl_App1.pdf [file Morris_Suppl_App1.pdf]

Online Supplementary Material

Morris DW, Budhwar N, Husain M, et al. Depression treatment in patients with general medical conditions: results from the CO-MED trial. *Ann Fam Med*. 2012;10(1):23-33.

<http://www.annfammed.org/content/10/1/23/suppl/DC1>

**Supplemental Appendix 1. Frequency and Intensity of Burden of Side Effects Rating (FIBSER)**

Name/ID: \_\_\_\_\_

Date: \_\_\_\_\_

**INSTRUCTIONS:** Select the best response for the following 3 questions.

- Choose the response that best describes the frequency (how often) of the side effects of the medication you have taken within the past week for your depression. Do not rate side effects if you believe they are due to treatments that you are taking for medical conditions other than depression. Rate the frequency of these side effects for the past week.

|                          |                          |                          |                          |                          |                          |                          |
|--------------------------|--------------------------|--------------------------|--------------------------|--------------------------|--------------------------|--------------------------|
| No side effects          | Present 10% of the time  | Present 25% of the time  | Present 50% of the time  | Present 75% of the time  | Present 90% of the time  | Present all of the time  |
| <input type="checkbox"/> |
| 0                        | 1                        | 2                        | 3                        | 4                        | 5                        | 6                        |

- Choose the response that best describes the intensity (how severe) of the side effects that you believe are due to the medication you have taken within the last week for your depression. Rate the intensity of the side effect(s), when they occurred, over the last week.

|                          |                          |                          |                          |                          |                          |                          |
|--------------------------|--------------------------|--------------------------|--------------------------|--------------------------|--------------------------|--------------------------|
| No side effects          | Trivial                  | Mild                     | Moderate                 | Marked                   | Severe                   | Intolerable              |
| <input type="checkbox"/> |
| 0                        | 1                        | 2                        | 3                        | 4                        | 5                        | 6                        |

- Choose the response that best describes the degree to which antidepressant medication side effects that you have had over the last week have interfered with your day to day functions.

|                          |                          |                          |                          |                          |                          |                                        |
|--------------------------|--------------------------|--------------------------|--------------------------|--------------------------|--------------------------|----------------------------------------|
| No impairment            | Minimal impairment       | Mild impairment          | Moderate impairment      | Marked impairment        | Severe impairment        | Unable to function due to side effects |
| <input type="checkbox"/>               |
| 0                        | 1                        | 2                        | 3                        | 4                        | 5                        | 6                                      |
